# Supplementary material for: A Reduce and Replace Strategy for Suppressing Vector-Borne Diseases: Insights from a Stochastic, Spatial Model
Source: PubMed Central journal article supplement (PMC3869666; doi:10.1371/journal.pone.0081860), 2013-12-20
Supplement: pone.0081860.s005.pdf [file pone.0081860.s005.pdf]

Supplementary Table S1. Summary of initial conditions for the model.

| Variable                             | Value    |
|--------------------------------------|----------|
| Number of sites                      | 2448     |
| Percent mosquito infested containers | 100      |
| Number of eggs per container         | 40       |
| Number of larvae per container       | 0        |
| Number of pupae per container        | 0        |
| Number of adult mosquitoes per house | 0        |
| Initial sex ratio                    | 1:1      |
| Boundary conditions                  | Periodic |
| Wild-type frequency                  | 100      |
